# Supplementary material for: Optimizing rock glacier activity classification in South Tyrol (northeastern Italy): integrating multisource data with statistical modelling
Source: Copernicus journal article supplement (doi:10.5194/tc-19-3493-2025), 2025-09-04
Supplement: Supplementary file 1 [file tc-19-3493-2025-supplement.pdf]

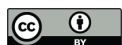

*Supplement of*

**Optimizing rock glacier activity classification in South Tyrol  
(northeastern Italy): integrating multisource data  
with statistical modelling**

**Chiara Crippa et al.**

*Correspondence to:* Chiara Crippa ([chiara.crippa@eurac.edu](mailto:chiara.crippa@eurac.edu))

The copyright of individual parts of the supplement might differ from the article licence.

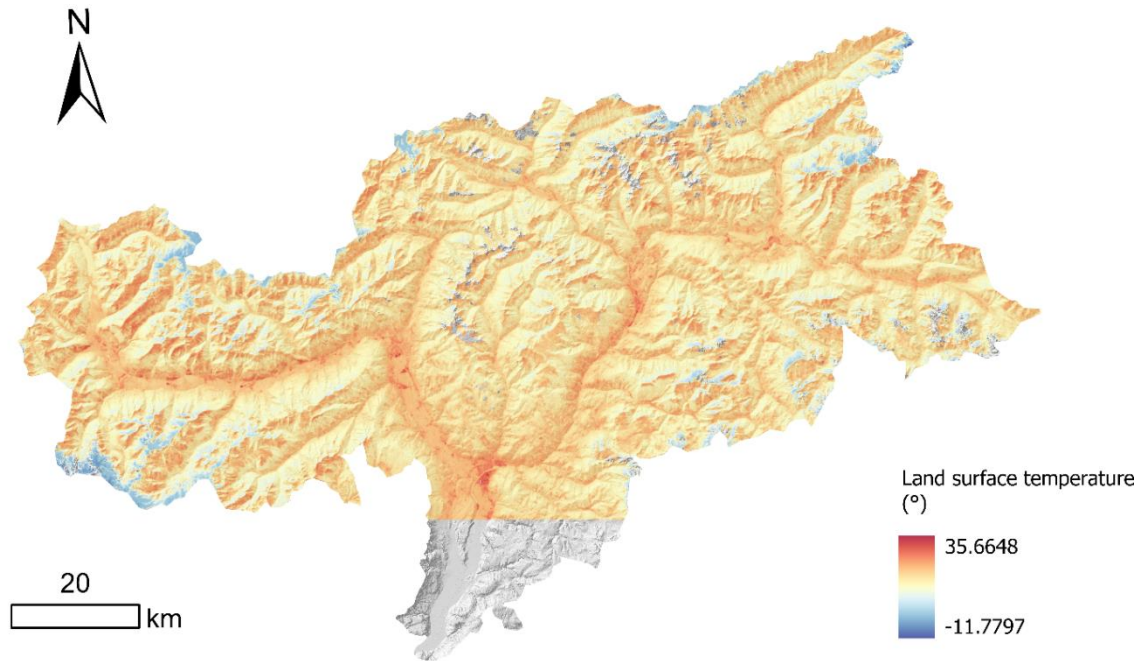

Figure S1: mean land surface temperature for September months between 2013 and 2023.

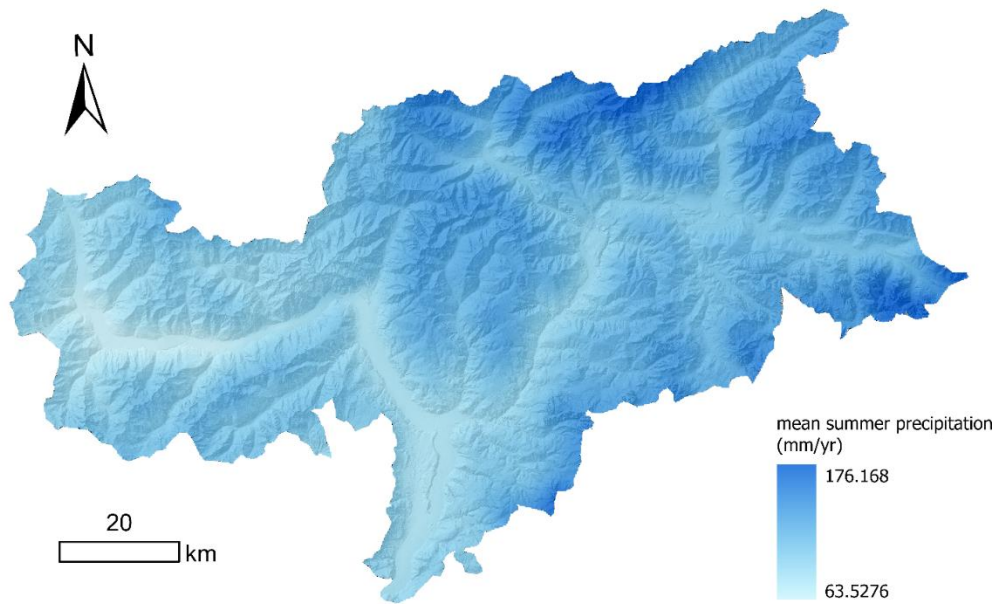

Figure S2: mean summer precipitation (solid and liquid) from 2000 to 2018 computed as interpolation from ground weather station values. See Crespi et al., 2021.

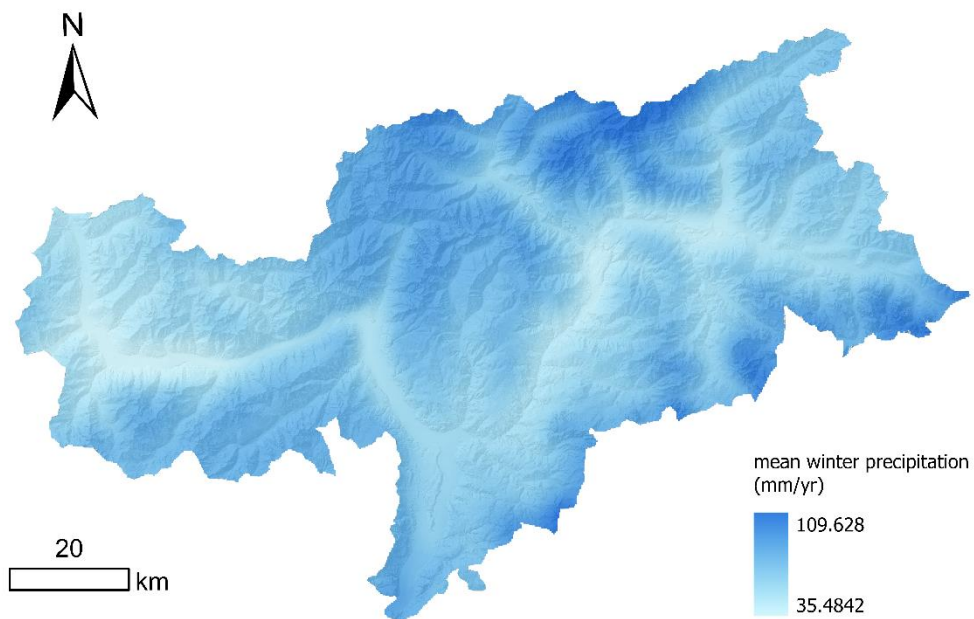

Figure S3: mean winter precipitation (solid and liquid) from 2000 to 2018 computed as interpolation from ground weather station values. See Crespi et al., 2021.

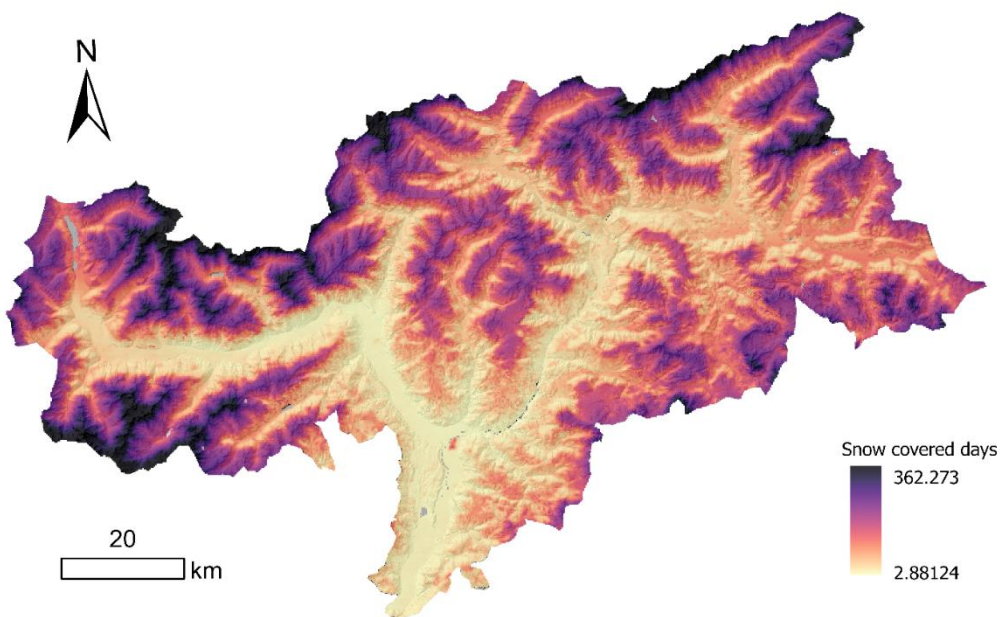

Figure S4: mean snow cover duration (SCD) map from MODIS data. Snow covered days are computed as mean value between 2013 and 2023.

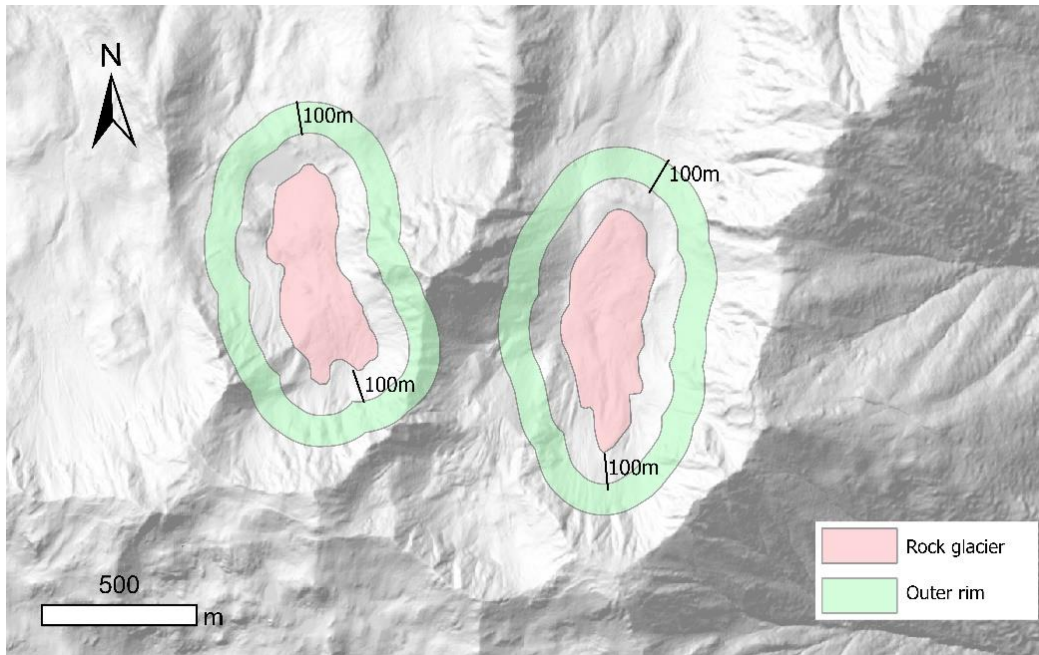

*Figure S5: areas used to extract statistics of the environmental and morphological descriptors: rock glacier polygon and the surrounding rim of 100m.*
